# Supplementary material for: Breathing Practices for Stress and Anxiety Reduction: Conceptual Framework of Implementation Guidelines Based on a Systematic Review of the Published Literature
Source: MDPI journal article supplement (doi:10.3390/brainsci13121612), 2023-11-21
Supplement: s1 [file s1]

## SUPPLEMENTARY MATERIAL

**Table S1:** Data synthesis main table showing the parameters investigated and the count per each parameter value. The intervention counts are split into columns by effective and ineffective outcome for reducing stress and anxiety.

ANB, alternate-nostril breathing; BPM, breaths per minute; FW, framework; HW, homework; Ix, intervention; min, minutes; N, number; RCT, randomized controlled trial; v, versus.

| Category                               | Parameter                                             | Value                             | Effective Interventions (N=54) |          | Ineffective Interventions (N=18) |          |
|----------------------------------------|-------------------------------------------------------|-----------------------------------|--------------------------------|----------|----------------------------------|----------|
|                                        |                                                       |                                   | Count                          | % (of N) | Count                            | % (of N) |
| Study-related factors                  | Study design                                          | RCT                               | 39                             | 72%      | 12                               | 67%      |
|                                        |                                                       | Stress 1er outcome                | 36                             | 67%      | 11                               | 61%      |
|                                        | # times stress outcome measured                       | 1x                                | 2                              | 4%       | 1                                | 6%       |
|                                        |                                                       | 2x                                | 29                             | 54%      | 12                               | 67%      |
|                                        |                                                       | 3+                                | 23                             | 43%      | 5                                | 28%      |
|                                        | Control                                               | Usual care / no intervention      | 24                             | 44%      | 12                               | 67%      |
|                                        |                                                       | Breath + other component          | 13                             | 24%      | 3                                | 17%      |
|                                        |                                                       | Non-breath active control         | 12                             | 22%      | 5                                | 28%      |
|                                        |                                                       | Meditation / mindfulness          | 12                             | 22%      | 4                                | 22%      |
|                                        |                                                       | One control or a mix of above     | 46                             | 85%      | 18                               | 100%     |
|                                        |                                                       | No control                        | 8                              | 15%      | 0                                | 0%       |
|                                        |                                                       | No control or another breath ONLY | 8                              | 15%      | 0                                | 0%       |
| Breath practice type / characteristics | Fast only:                                            |                                   | 0                              | 0%       | 2                                | 11%      |
|                                        | Slow only:                                            |                                   | 36                             | 67%      | 13                               | 72%      |
|                                        | Breaths per minute (BPM):                             | Slow BPM <8                       | 12                             | 33%      | 4                                | 31%      |
|                                        |                                                       | Slow BPM 8-12                     | 3                              | 8%       | 1                                | 8%       |
|                                        |                                                       | Bpm NR                            | 21                             | 58%      | 8                                | 62%      |
|                                        | Contained these components                            | deep breathing                    | 22                             | 61%      | 6                                | 46%      |
|                                        |                                                       | diaphragmatic breathing           | 16                             | 44%      | 4                                | 31%      |
|                                        |                                                       | general slow breathing            | 17                             | 47%      | 8                                | 62%      |
|                                        |                                                       | extended exhale                   | 12                             | 33%      | 3                                | 23%      |
|                                        |                                                       | Breath holds / pauses             | 6                              | 17%      | 3                                | 23%      |
|                                        |                                                       | Pursed lip breathing              | 5                              | 14%      | 1                                | 8%       |
|                                        | Slow & fast:                                          |                                   | 12                             | 22%      | 0                                | 0%       |
|                                        | Contained these components                            | deep breathing                    | 7                              | 13%      | 0                                | 0%       |
|                                        |                                                       | diaphragmatic breathing           | 2                              | 4%       | 0                                | 0%       |
|                                        |                                                       | general slow breathing            | 3                              | 6%       | 0                                | 0%       |
|                                        |                                                       | extended exhale                   | 5                              | 9%       | 0                                | 0%       |
|                                        |                                                       | Breath holds / pauses             | 4                              | 7%       | 0                                | 0%       |
|                                        |                                                       | Pursed lip breathing              | 2                              | 4%       | 0                                | 0%       |
|                                        | Regular-paced                                         |                                   | 1                              | 2%       | 1                                | 6%       |
|                                        | ANB                                                   |                                   | 5                              | 9%       | 2                                | 11%      |
|                                        | ANB deeper look                                       | ANB and clinical (acute)          | 1                              | 20%      | 0                                | 0%       |
|                                        |                                                       | ANB and sim-stress                | 1                              | 20%      | 2                                | 100%     |
|                                        |                                                       | ANB and Human-guided              | 5                              | 100%     | 1                                | 50%      |
|                                        |                                                       | ANB and multiple sessions         | 4                              | 80%      | 1                                | 50%      |
|                                        |                                                       | ANB and long-term                 | 3                              | 60%      | 0                                | 0%       |
|                                        | Paces other than fast-only contained these components | deep breathing                    | 29                             | 54%      | 6                                | 33%      |
|                                        |                                                       | diaphragmatic breathing           | 18                             | 33%      | 4                                | 22%      |
|                                        |                                                       | general slow breathing            | 20                             | 37%      | 8                                | 44%      |
|                                        |                                                       | extended exhale                   | 17                             | 31%      | 3                                | 17%      |
|                                        |                                                       | Breath holds / pauses             | 10                             | 19%      | 3                                | 17%      |
|                                        |                                                       | Pursed lip breathing              | 7                              | 13%      | 1                                | 6%       |

|                                      |                                                                                                                            |                                |    |     |    |     |
|--------------------------------------|----------------------------------------------------------------------------------------------------------------------------|--------------------------------|----|-----|----|-----|
| Breath practice training / guidance  | Human-guided                                                                                                               | Yes                            | 50 | 93% | 6  | 33% |
|                                      | Human-guided type (among human-guided only)                                                                                | audio recording                | 1  | 2%  | 0  | 0%  |
|                                      |                                                                                                                            | video recording                | 3  | 6%  | 1  | 17% |
|                                      |                                                                                                                            | live / real-time video         | 6  | 12% | 0  | 0%  |
|                                      |                                                                                                                            | live in-person                 | 40 | 80% | 5  | 83% |
|                                      | Human-guided - number human-guided sessions (among human-guided only)                                                      | 1 only                         | 22 | 44% | 2  | 33% |
|                                      |                                                                                                                            | 2-3                            | 4  | 8%  | 3  | 50% |
|                                      |                                                                                                                            | 4+                             | 24 | 48% | 0  | 0%  |
|                                      |                                                                                                                            | NR                             | 0  | 0%  | 1  | 17% |
|                                      | Human-guided - session (among human-guided only)                                                                           | <=5 min                        | 9  | 18% | 1  | 17% |
|                                      |                                                                                                                            | 6-10 min                       | 6  | 12% | 1  | 17% |
|                                      |                                                                                                                            | 11+ min                        | 27 | 54% | 3  | 50% |
|                                      |                                                                                                                            | Duration NR                    | 7  | 14% | 1  | 17% |
|                                      | Device guided                                                                                                              | Yes                            | 8  | 15% | 7  | 39% |
|                                      | Device-guided only (device-guided with NO human-guided)                                                                    | Yes                            | 3  | 6%  | 7  | 39% |
|                                      | Among device-guided only device type                                                                                       | Device only - visual screen    | 2  | 4%  | 4  | 22% |
|                                      |                                                                                                                            | Device only - audio cues/tones | 1  | 2%  | 2  | 11% |
|                                      |                                                                                                                            | Device only - type other       | 0  | 0%  | 1  | 6%  |
|                                      | Among device only # device sessions                                                                                        | 1 only                         | 2  | 4%  | 7  | 39% |
|                                      |                                                                                                                            | 2-3                            | 1  | 2%  | 0  | 0%  |
|                                      |                                                                                                                            | 4+                             | 0  | 0%  | 0  | 0%  |
|                                      | Device only - session duration                                                                                             | <=5 min                        | 2  | 4%  | 7  | 39% |
|                                      |                                                                                                                            | 6-10 min                       | 1  | 2%  | 0  | 0%  |
|                                      |                                                                                                                            | 11+ min                        | 0  | 0%  | 0  | 0%  |
| Group v individual                   | Group only                                                                                                                 | yes                            | 15 | 28% | 6  | 33% |
|                                      | Individual only                                                                                                            | yes                            | 33 | 61% | 10 | 56% |
|                                      | Group & individual                                                                                                         | yes                            | 3  | 6%  | 0  | 0%  |
|                                      | Unclear group/indiv                                                                                                        | yes                            | 3  | 6%  | 2  | 11% |
| HW practice                          | Included HW                                                                                                                | yes                            | 19 | 35% | 3  | 17% |
|                                      | Among lx's with HW # HW sessions                                                                                           | 1 only                         | 0  | 0%  | 0  | 0%  |
|                                      |                                                                                                                            | 2-3                            | 1  | 2%  | 0  | 0%  |
|                                      |                                                                                                                            | 4+                             | 15 | 28% | 1  | 6%  |
|                                      | Among lx's with HW duration HW sessions                                                                                    | <=5 min                        | 5  | 9%  | 0  | 0%  |
|                                      |                                                                                                                            | 6-10 min                       | 2  | 4%  | 0  | 0%  |
|                                      |                                                                                                                            | 11+ min                        | 4  | 7%  | 1  | 6%  |
| Session / lx duration                | lx duration (days)                                                                                                         | 1                              | 21 | 39% | 16 | 89% |
|                                      |                                                                                                                            | 2-5                            | 6  | 11% | 0  | 0%  |
|                                      |                                                                                                                            | 6-30                           | 12 | 22% | 0  | 0%  |
|                                      |                                                                                                                            | 31+                            | 15 | 28% | 1  | 6%  |
|                                      | Multiple sessions                                                                                                          | yes                            | 44 | 81% | 5  | 28% |
|                                      | # sessions total known                                                                                                     | 1                              | 12 | 22% | 13 | 72% |
|                                      |                                                                                                                            | 2-5                            | 17 | 31% | 2  | 11% |
|                                      |                                                                                                                            | 6+                             | 22 | 41% | 1  | 6%  |
|                                      |                                                                                                                            | Compliance NR                  | 3  |     | 2  |     |
|                                      | General session duration (minutes)                                                                                         | <5 min                         | 3  | 6%  | 6  | 33% |
|                                      |                                                                                                                            | 5-10 min                       | 16 | 30% | 3  | 17% |
|                                      |                                                                                                                            | 11-20 min                      | 10 | 19% | 3  | 17% |
|                                      |                                                                                                                            | >20 min                        | 17 | 31% | 3  | 17% |
|                                      |                                                                                                                            | NR                             | 8  | 15% | 3  | 17% |
| Other Broader framework (FW) factors | Long-term practice                                                                                                         | yes                            | 27 | 50% | 2  | 11% |
|                                      | Long-term practice AND continued through measurement period                                                                | yes                            | 25 | 46% | 0  | 0%  |
|                                      | Which ones met<br>A = hum-guided<br>B = multi session<br>C = long-term<br>D = long-term AND cont'd thru measurement period | A only                         | 9  | 17% | 2  | 11% |
|                                      |                                                                                                                            | A B                            | 14 | 26% | 2  | 11% |
|                                      |                                                                                                                            | A B C                          | 1  | 2%  | 2  | 11% |
|                                      |                                                                                                                            | A B C D                        | 26 | 48% | 0  | 0%  |

|                                      |        |    |     |    |     |
|--------------------------------------|--------|----|-----|----|-----|
|                                      | B only | 3  | 6%  | 1  | 6%  |
| Meet $\geq 1$ FW criteria            | yes    | 53 | 98% | 7  | 39% |
| Exact number of FW criteria included | 0      | 1  | 2%  | 11 | 61% |
|                                      | 1      | 12 | 22% | 3  | 17% |
|                                      | 2      | 14 | 26% | 2  | 11% |
|                                      | 3      | 1  | 2%  | 2  | 11% |
|                                      | 4      | 26 | 48% | 0  | 0%  |

**Table S2:** Use of framework components in the 72 interventions from the 58 included studies. Multiple rows listed for studies that included multiple interventions numbering of which is consistent with that in the manuscript's Table 1. Red font represents the cases where fast-only breathing or <5-minute sessions were used. Human-guided training defined as use of live or pre-recorded audio or video human instruction throughout at least the initial breath session. Multiple sessions defined as performing breathing practice more than once. Long-term practice defined as performing  $\geq 6$  sessions over  $\geq 1$  week. m, minutes; NR, not reported.

| Population     | Study           | Significant Benefit for Stress Outcome? | Avoided?            |                 | Core components included?<br>A: human-guided<br>B: multiple sessions<br>C: long-term practice |
|----------------|-----------------|-----------------------------------------|---------------------|-----------------|-----------------------------------------------------------------------------------------------|
|                |                 |                                         | Fast-only breathing | <5 min sessions |                                                                                               |
| Youth          | Sellakumar 2015 | Yes                                     | ✓                   | ✓               | A B C                                                                                         |
|                | Khng 2017       | Yes                                     | ✓                   | ✓               | A B                                                                                           |
|                | Bargale 2021    | Yes                                     | ✓                   | NR              | A B                                                                                           |
|                | Hakke 2017      | Yes                                     | ✓                   | ✓               | A B C                                                                                         |
| Healthy Adults | Gupta 2010      | Yes                                     | ✓                   | NR              | A B C                                                                                         |
|                | Bhimani 2011    | Yes                                     | ✓                   | ✓               | A B C                                                                                         |
|                | Sharma-1 2013   | Yes                                     | ✓                   | ✓               | A B C                                                                                         |
|                | Sharma-2 2013   | Yes                                     | ✓                   | ✓               | A B C                                                                                         |
|                | Sundram 2014    | Yes                                     | ✓                   | ✓               | A B C                                                                                         |
|                | Schmalzl 2018   | Yes                                     | ✓                   | ✓               | A B C                                                                                         |
|                | Okado 2020      | Yes                                     | ✓                   | NR              | A B C                                                                                         |
|                | Magnon 2021     | Yes                                     | ✓                   | ✓               | A B                                                                                           |
|                | Balban-1 2023   | Yes                                     | ✓                   | ✓               | A B C                                                                                         |
|                | Balban-2 2023   | Yes                                     | ✓                   | ✓               | A B C                                                                                         |
|                | Balban-3 2023   | Yes                                     | ✓                   | ✓               | A B C                                                                                         |
|                | Busch 2012      | Yes                                     | ✓                   | ✓               | A B C                                                                                         |
|                | Lin-1 2014      | No                                      | ✓                   | 2 min           |                                                                                               |

|                  |                                |     |   |         |       |
|------------------|--------------------------------|-----|---|---------|-------|
|                  | Lin-2 2014                     | No  | ✓ | 2 min   |       |
|                  | Lin-3 2014                     | No  | ✓ | 2 min   |       |
|                  | Lin-4 2014                     | No  | ✓ | 2 min   |       |
|                  | Hunt 2018                      | Yes | ✓ | ✓       | A B   |
|                  | Naik 2018                      | Yes | ✓ | ✓       | A B C |
|                  | Conlon-1 2022                  | Yes | ✓ | ✓       | A     |
|                  | Conlon-2 2022                  | Yes | ✓ | ✓       | A     |
|                  | Schlatter 2022                 | Yes | ✓ | ✓       |       |
| High-anxiety     | Clark 1990                     | Yes | ✓ | ✓       | B     |
|                  | Chen 2017                      | Yes | ✓ | NR      | A B C |
|                  | Serafim 2018                   | Yes | ✓ | ✓       | A B C |
|                  | Clark 1985                     | Yes | ✓ | ✓       | A B   |
| Clinical (acute) | Biggs 2003                     | No  | ✓ | NR      |       |
|                  | Hayama 2012                    | Yes | ✓ | ✓       | A B   |
|                  | Valenza 2014                   | Yes | ✓ | ✓       | A B C |
|                  | Bidgoli 2016                   | Yes | ✓ | ✓       | A     |
|                  | Boaviagem 2017                 | No  | ✓ | NR      |       |
|                  | Cicek 2017                     | Yes | ✓ | ✓       | A B   |
|                  | Chandrababu 2019               | Yes | ✓ | ✓       | A B   |
|                  | Ratcliff 2019                  | No  | ✓ | NR      | A B   |
|                  | Grinberg 2020                  | Yes | ✓ | NR      | A B   |
|                  | Abo El Ata AB 2021             | Yes | ✓ | NR      | A B C |
|                  | Hosseinzadeh-Karimkoshteh 2021 | Yes | ✓ | ✓       | A B   |
|                  | Zahn 2021                      | Yes | ✓ | NR      | A B   |
|                  | Moghadam 2022                  | Yes | ✓ | ✓       | A     |
|                  | Aktaş-1 2023                   | Yes | ✓ | 1.3 min | B     |

|                               |                   |     |                        |       |       |
|-------------------------------|-------------------|-----|------------------------|-------|-------|
|                               | Aktaş-2 2023      | No  | ✓                      | 1 min | B     |
|                               | Dhruva 2012       | Yes | ✓                      | ✓     | A B C |
|                               | Park 2013         | Yes | ✓                      | NR    | A B   |
|                               | Eldin 2015        | Yes | ✓                      | ✓     | A B   |
|                               | Iyer 2020         | Yes | ✓                      | ✓     | A B C |
|                               | Ursavas 2020      | Yes | ✓                      | ✓     | A B   |
|                               | Lu 2022           | Yes | ✓                      | ✓     | A B C |
| <b>Clinical<br/>(chronic)</b> | Marshall 2014     | Yes | ✓                      | ✓     | A B C |
|                               | Han 1996          | Yes | ✓                      | ✓     | A B C |
|                               | Thomas 2009       | Yes | ✓                      | ✓     | A B C |
|                               | Jefferson 2010    | No  | ✓                      | ✓     |       |
|                               | Sureka 2014       | Yes | ✓                      | ✓     | A B C |
|                               | Sureka 2015       | Yes | ✓                      | ✓     | A B C |
|                               | Thomas-1 2017     | No  | ✓                      | ✓     | A B C |
|                               | Thomas-2 2017     | No  | ✓                      | ✓     | A B C |
|                               | Fiskin 2018       | Yes | ✓                      | ✓     | A B C |
|                               | Watson-1 2022     | No  | Fast breathing<br>only | 3 min | A     |
|                               | Watson-2 2022     | Yes | ✓                      | 3 min | A     |
| <b>Simulated<br/>Stress</b>   | Kamath 2017       | No  | ✓                      | ✓     | A B   |
|                               | Holmes 1978       | No  | ✓                      | ✓     |       |
|                               | McCaul 1979       | Yes | ✓                      | 2 min | B     |
|                               | Sakakibara-1 1996 | No  | ✓                      | ✓     |       |
|                               | Sakakibara-2 1996 | No  | Fast breathing<br>only | ✓     |       |
|                               | Telles 2019       | No  | ✓                      | ✓     |       |
|                               | Meier 2020        | No  | ✓                      | ✓     | A     |
|                               | Sharma-1 2022     | Yes | ✓                      | ✓     | A     |

|  |               |     |   |   |   |
|--|---------------|-----|---|---|---|
|  | Sharma-2 2022 | Yes | ✓ | ✓ | A |
|  | Sharma-3 2022 | Yes | ✓ | ✓ | A |
|  | Sharma-4 2022 | Yes | ✓ | ✓ | A |
